# Supplementary material for: Lower Education and Reading and Writing Habits Are Associated With Poorer Oral Discourse Production in Typical Adults and Older Adults
Source: Front Psychol. 2022 Mar 18;13:740337. doi: 10.3389/fpsyg.2022.740337 (PMC8972065; doi:10.3389/fpsyg.2022.740337)
Supplement: Supplementary file 1 [file Table_1.XLSX]

## Sheet: Table S1
Subj	Age	Gender	SES	MMSE	Educ	RWH	TotalP	CCPs	No.CCPs	IncPs	Mods	Ref	Lex	Conj	Eli	Est	CohDs	Eref	Econj	Einfo	Emissing	Esent	CohEs	Lcoh	Gcoh	Mps	WC
1	55	Female		20	0	0	33	0.030303	0.909091	0.0606061	0.575758	0.0263158	0.0131579	0.00877193	0	0	0.0482456	0.00877193	0.00438597	0.0438596	0.0131579	0.0131579	0.0833333	2	0	0	228
2	63	Male		18	0	0	18	0.166667	0.611111	0.222222	0.222222	0	0	0	0	0	0	0.00854701	0.00854701	0.0769231	0.034188	0.025641	0.153846	2	1	0	192
3	61	Female		22	0	0	11	0.818182	0.0909091	0.0909091	0.272727	0.0941176	0.0705882	0.0235294	0.0235294	0	0.211765	0	0	0.0235294	0.0117647	0	0.0352941	7	5	6	85
4	73	Female	18	23	1	0	20	0.2	0.6	0.2	0.6	0.0362694	0.0310881	0.00518135	0.015544	0	0.0880829	0.00518135	0	0.0259067	0	0.00518135	0.0362694	6	1	1	213
5	71	Female		20	1		23	0	0.73913	0.26087	0.869565	0	0	0.00609756	0	0	0.00609756	0.0121951	0	0.0182927	0.0243902	0.0121951	0.0670732	2	0	0	165
6	74	Female	17	27	2	1	13	0.923077	0	0.0769231	0	0.0860215	0.0645161	0.0752688	0.0537634	0	0.27957	0	0	0	0	0.0107527	0.0107527	12	9	6	90
7	78	Female	18	24	2	5	11	0.545455	0.272727	0.181818	0.0909091	0.03125	0.046875	0.046875	0.015625	0	0.140625	0.0625	0	0.03125	0.03125	0.015625	0.140625	2	1	0	68
8	70	Female	19	25	2	4	30	0.466667	0.5	0.0333333	0.333333	0.0133929	0.0267857	0.0178571	0.00446429	0	0.0625	0.0133929	0	0.03125	0	0	0.0446429	15	6	4	238
9	72	Female	24	28	3	5	12	0.583333	0.333333	0.0833333	0.666667	0.0123457	0.0740741	0.0493827	0.0493827	0.0123457	0.197531	0	0	0.0123457	0.0123457	0	0.0246914	8	7	3	81
10	71	Female	32	26	3	9	22	0.363636	0.590909	0.0454545	0.318182	0.0855263	0.0526316	0.0263158	0	0	0.164474	0.00657895	0	0.00657895	0.00657895	0	0.0197368	13	7	2	155
11	75	Male	23	25	3	2	12	0.333333	0.583333	0.0833333	0.583333	0.0263158	0.0263158	0	0.0263158	0.0131579	0.0921053	0.0131579	0	0.0526316	0.0263158	0	0.0921053	2	1	0	165
12	58	Female	17	22	3	9	11	0.818182	0.181818	0	0.181818	0.111111	0.0493827	0.0246914	0.0123457	0.0123457	0.209877	0.0123457	0	0	0	0	0.0123457	9	9	5	132
13	79	Female	18	27	3	15	20	0.25	0.45	0.3	0.4	0.0243902	0.0487805	0.0162602	0	0	0.0894309	0.0243902	0	0.0569106	0.0162602	0.0162602	0.113821	4	1	0	146
14	80	Female	13	26	3	0	18	0.777778	0.111111	0.111111	0.277778	0.0852713	0.0697674	0.0387597	0.0310078	0	0.224806	0.0155039	0.00775194	0.0155039	0	0.00775194	0.0465116	11	6	3	147
15	66	Female	22	22	3	5	21	0.47619	0.333333	0.190476	0.285714	0.0844156	0.025974	0.00649351	0.012987	0.00649351	0.136364	0.012987	0	0	0.012987	0	0.025974	7	6	5	159
16	72	Male	22	29	3	3	17	0.941176	0	0.0588235	0	0.0458015	0.0381679	0.0152672	0.0152672	0	0.114504	0.00763359	0	0.00763359	0	0.00763359	0.0229008	16	6	6	128
17	65	Female	25	29	3	11	19	0.631579	0.210526	0.157895	0.368421	0.047619	0.0680272	0.0272109	0.0204082	0	0.163265	0.0136054	0	0.0136054	0.0136054	0	0.0408163	12	9	6	141
18	72	Female	23	30	4	13	20	0.15	0.85	0	0.15	0.0522388	0.0223881	0.0149254	0	0	0.0895522	0.00746269	0	0.0373134	0	0.0223881	0.0671642	6	3	0	145
19	73	Female	31	25	4	11	17	0.647059	0.235294	0.117647	0.235294	0.0603448	0.0431034	0.0517241	0.0172414	0	0.172414	0	0	0.00862069	0	0	0.00862069	8	7	4	118
20	78	Male	27	27	4	4	9	0.444444	0.555556	0	1.11111	0.0610687	0.0152672	0.0381679	0	0.00763359	0.122137	0.0458015	0	0.0305344	0	0	0.0763359	11	4	2	159
21	72	Female	15	25	4	4	11	0.272727	0.181818	0.545455	0.0909091	0.0169492	0.0254237	0	0	0	0.0423729	0	0	0.0254237	0.0508475	0	0.0762712	0	1	0	187
22	51	Female	17	28	4	12	7	1	0	0	0	0.111111	0.0952381	0	0	0	0.206349	0	0	0.015873	0	0	0.015873	7	6	2	112
23	67	Female	24	29	4	8	15	1	0	0	0	0.0686275	0.0980392	0.0784314	0.0588235	0	0.303922	0	0	0	0	0	0	14	10	6	90
24	67	Female	15	29	4	15	12	0.833333	0.0833333	0.0833333	0.0833333	0.0862069	0.0862069	0.0344828	0.0344828	0	0.241379	0	0	0.0172414	0.0172414	0	0.0344828	11	5	2	59
25	68	Female	25	22	4	3	9	0.111111	0.333333	0.555556	0.333333	0	0.0153846	0	0	0	0.0153846	0.0153846	0	0.0307692	0.0153846	0	0.0615385	2	2	0	65
26	78	Male	20	27	4	6	13	0.846154	0.0769231	0.0769231	0	0.104167	0.0416667	0.0416667	0.03125	0.0104167	0.229167	0	0	0.03125	0.0104167	0	0.0416667	13	6	4	83
27	79	Female	24	28	5	4	19	0.157895	0.631579	0.210526	0.315789	0.0485437	0.0194175	0.00970874	0	0	0.0776699	0.038835	0	0.0679612	0.0291262	0	0.135922	2	0	0	109
28	62	Female	27	30	5	14	10	0.2	0.8	0	0.1	0.0625	0.0520833	0.0208333	0.0104167	0	0.145833	0.0104167	0	0.0833333	0	0	0.09375	8	0	0	94
29	72	Female	21	30	5	15	18	0.833333	0.166667	0	0.166667	0.0942029	0.0652174	0.0144928	0.0217391	0	0.195652	0	0	0.0144928	0	0	0.0144928	17	8	4	153
30	67	Female	18	28	5	5	11	0.909091	0.0909091	0	0.0909091	0.0694444	0.0694444	0.0416667	0.0277778	0	0.208333	0.0138889	0	0	0	0	0.0138889	11	6	6	64
31	75	Male	24	29	5	1	9	1	0	0	0	0.0930233	0.0930233	0.0348837	0.0232558	0.0116279	0.255814	0.0232558	0	0	0	0	0.0232558	6	6	4	96
32	73	Male	21	28	5	5	17	0.411765	0.176471	0.411765	0.411765	0.010989	0.010989	0.010989	0	0	0.032967	0.010989	0.010989	0.032967	0.043956	0.021978	0.120879	3	1	0	85
33	62	Male	19	29	5	7	17	0.764706	0.235294	0	0.117647	0.0859375	0.0546875	0.0234375	0.015625	0	0.179688	0	0	0.03125	0	0	0.03125	15	5	3	128
34	74	Female	21	29	5	12	7	0.857143	0	0.142857	0	0.0789474	0.0526316	0.0263158	0.0526316	0	0.210526	0	0	0.0263158	0.0263158	0	0.0526316	5	4	3	49
35	67	Male	23	27	5	4	17	0.117647	0.411765	0.470588	0.235294	0.00819672	0.0163934	0.0245902	0	0	0.0491803	0.0245902	0.00819672	0.0163934	0.0245902	0.0245902	0.0983607	7	2	0	127
36	74	Female	20	23	5	11	24	0.833333	0.125	0.0416667	0.166667	0.048	0.032	0.04	0.016	0	0.136	0.008	0	0.016	0	0.008	0.032	11	5	4	126
37	72	Male	24	28	5	4	9	1	0	0	0.111111	0.057971	0.057971	0.0144928	0.0144928	0.0144928	0.15942	0.0144928	0.0144928	0	0	0	0.0289855	9	5	5	70
38	67	Male	18	25	5	12	9	0.777778	0.111111	0.111111	0	0	0.127273	0.0181818	0.0545455	0	0.2	0.0363636	0	0.0181818	0.0363636	0	0.0909091	9	5	4	55
39	63	Female	14	23	6	8	25	0.24	0.64	0.12	0.48	0.0671937	0.0434783	0.00790514	0.00790514	0	0.126482	0	0	0.00395257	0.0118577	0.00790514	0.0237154	10	8	6	255
40	70	Female	17	27	6	21	10	0.5	0.3	0.2	0.2	0.0133333	0.0533333	0.0133333	0.0266667	0	0.106667	0.04	0	0.0266667	0.04	0.0266667	0.133333	2	2	2	67
41	65	Female	24	27	6	10	18	0.555556	0.333333	0.111111	0.111111	0.0188679	0.0754717	0.0314465	0.00628931	0	0.132075	0.00628931	0.00628931	0.00628931	0	0.00628931	0.0251572	14	9	4	101
42	65	Female	15	23	6	10	13	0.538462	0.384615	0.0769231	0.0769231	0.0659341	0.032967	0.021978	0.010989	0.010989	0.142857	0.010989	0	0	0	0.010989	0.021978	6	5	4	111
43	65	Female	18	29	6	17	20	0.75	0.2	0.05	0.25	0.057971	0.0652174	0.0144928	0.0289855	0	0.166667	0	0	0.0217391	0.00724638	0	0.0289855	14	4	2	137
44	63	Male	16	28	7	10	18	0.666667	0.277778	0.0555556	0.333333	0.0479452	0.0479452	0.0205479	0.0342466	0	0.150685	0	0	0.0136986	0	0	0.0136986	8	5	3	162
45	60	Female	22	27	7	12	9	0.888889	0	0.111111	0.222222	0.05	0.075	0.025	0	0	0.15	0	0	0	0	0	0	8	4	2	81
46	73	Male	23	27	7	3	21	0.809524	0.0952381	0.0952381	0.047619	0.116667	0.108333	0.0666667	0.0333333	0	0.325	0	0	0.0166667	0.0333333	0.00833333	0.0583333	16	10	6	123
47	73	Female	27	30	8	19	13	0.615385	0.230769	0.153846	0.230769	0.0638298	0.0851064	0.0106383	0.0106383	0	0.170213	0	0.0106383	0.0212766	0.0212766	0	0.0531915	7	7	4	96
48	71	Female	22	29	8	11	11	0.636364	0.181818	0.181818	0.0909091	0.047619	0.0634921	0.0634921	0.031746	0	0.206349	0	0	0.015873	0	0	0.015873	7	7	3	53
49	73	Female	15	29	8	15	13	1	0	0	0	0.0673077	0.0673077	0.0384615	0.0384615	0.00961539	0.221154	0	0	0	0	0	0	15	8	6	104
50	67	Female	23	30	8	13	12	0.833333	0.166667	0	0	0.125	0.0454545	0.0454545	0.0227273	0	0.238636	0.0227273	0	0.0227273	0	0	0.0454545	11	9	3	72
51	75	Male	29	28	8	11	9	0.888889	0.111111	0	0.222222	0.0655738	0.0163934	0.0819672	0.0655738	0	0.229508	0	0	0.0327869	0	0	0.0327869	8	7	5	83
52	82	Female	19	29	8	19	37	0.324324	0.621622	0.0540541	0.486486	0.0431655	0.028777	0.0179856	0.0107914	0	0.100719	0	0	0.0107914	0.0215827	0.00719425	0.0395683	13	6	3	290
53	77	Female	22	28	9	8	20	0.4	0.45	0.15	0.1	0.0134228	0.0738255	0.0268456	0.0201342	0	0.134228	0	0	0.0134228	0.00671141	0	0.0201342	7	9	4	175
54	60	Female	27	30	9	9	15	0.0666667	0.933333	0	0.2	0.0857143	0.0428571	0	0.0142857	0	0.142857	0	0.0285714	0.114286	0	0.0285714	0.171429	10	0	0	72
55	72	Female	22	23	9	11	12	0.833333	0.0833333	0.0833333	0.333333	0.03	0.08	0.03	0.03	0	0.17	0	0	0	0.01	0	0.01	11	8	6	67
56	66	Female	20	29	9	19	9	0.777778	0	0.222222	0	0.0444444	0.0444444	0.0666667	0.0666667	0	0.222222	0.0666667	0	0	0.0222222	0	0.0888889	6	6	5	66
57	63	Female	28	29	9	11	20	0.85	0.1	0.05	0.1	0.0619469	0.0530973	0.0176991	0.0353982	0	0.168142	0	0	0.00884956	0.00884956	0	0.0176991	12	8	6	119
58	63	Female	21	27	10	13	12	0.75	0.25	0	0	0.0806452	0.0967742	0.0645161	0.0645161	0	0.306452	0	0	0.0483871	0	0	0.0483871	8	6	3	75
59	75	Male		28	10	8	16	0.6875	0.3125	0	0.0625	0.0410959	0.0547945	0.0410959	0.0136986	0	0.150685	0.0136986	0.0136986	0.0205479	0	0	0.0479452	17	8	6	149
60	71	Female	29	29	11	16	15	0.8	0.133333	0.0666667	0	0.0365854	0.0853659	0.0365854	0.0487805	0	0.207317	0	0	0.0243902	0	0	0.0243902	12	10	2	87
61	75	Female	23	27	11	13	14	0.857143	0.142857	0	0.142857	0.0229885	0.0804598	0.0229885	0.0574713	0	0.183908	0	0	0	0	0	0	13	6	5	167
62	79	Female	19	27	11	20	23	0.869565	0.130435	0	0.0434783	0.0703125	0.0546875	0.015625	0.03125	0	0.171875	0.0078125	0	0	0	0	0.0078125	16	9	6	128
63	53	Female	20	27	12	13	11	0.636364	0.181818	0.181818	0	0.0447761	0.0597015	0.0298507	0.0895522	0.0149254	0.238806	0.0149254	0	0	0.0447761	0.0149254	0.0746269	6	5	3	70
64	71	Male	21	28	12	16	7	1	0	0	0.142857	0.0454545	0.0606061	0.0606061	0.0606061	0	0.227273	0.0151515	0	0.0151515	0	0	0.030303	9	7	3	65
65	67	Female	16	30	12	15	13	1	0	0	0	0.0684932	0.123288	0.0410959	0.0547945	0	0.287671	0	0	0	0	0	0	13	10	5	77
66	63	Female	23	24	12	15	9	0.222222	0.777778	0	0	0	0.0724638	0.0144928	0.101449	0	0.188406	0.0289855	0	0.0289855	0	0.0144928	0.0724638	2	2	2	85
67	75	Female	19	22	12	14	14	0.857143	0.142857	0	0.214286	0.0784314	0.117647	0.0392157	0.00980392	0	0.245098	0	0	0	0	0	0	11	9	6	173
68	68	Female	20	30	12	15	18	0.722222	0.111111	0.166667	0.0555556	0.0265487	0.0619469	0.0176991	0.079646	0	0.185841	0	0	0.00884956	0.0176991	0	0.0265487	12	8	6	114
69	73	Female	21	29	12	9	16	0.5	0.25	0.25	0.375	0.0540541	0.045045	0.036036	0.018018	0	0.153153	0.00900901	0	0.018018	0.027027	0.018018	0.0720721	8	5	4	116
70	64	Female	17	30	12	22	19	0.947368	0	0.0526316	0	0.0793651	0.031746	0.0238095	0.015873	0.00793651	0.15873	0.00793651	0.00793651	0.00793651	0	0.00793651	0.031746	18	8	6	125
71	64	Male	32	30	12	7	27	0.666667	0.222222	0.111111	0.222222	0.0412371	0.0515464	0.0103093	0.0257732	0	0.128866	0.0103093	0.00515464	0	0.00515464	0.00515464	0.0257732	16	4	4	186
72	67	Female	38	26	12	24	16	1	0	0	0	0.128788	0.0606061	0.0378788	0.030303	0	0.257576	0	0	0	0	0	0	16	12	6	134
73	82	Female	30	25	12	10	34	0.176471	0.411765	0.411765	0.264706	0.00995025	0.00497512	0	0.00497512	0	0.0199005	0.00995025	0	0.0149254	0.0298507	0.00497512	0.0597015	3	3	0	221
74	67	Female	20	28	13	13	18	0.666667	0.222222	0.111111	0.444444	0.0787879	0.0363636	0	0.0242424	0.00606061	0.145455	0.0121212	0	0.0181818	0	0	0.030303	10	6	6	138
75	65	Female	22	28	13	14	29	0.344828	0.517241	0.137931	0	0.0377358	0.0314465	0.0188679	0.0125786	0.00628931	0.106918	0.00628931	0	0.0440252	0	0	0.0503145	11	0	0	214
76	72	Male	22	28	14	13	17	0.647059	0.235294	0.117647	0.117647	0.0516129	0.083871	0.0258065	0.0129032	0.00645161	0.180645	0	0.00645161	0	0	0.0193548	0.0258065	15	8	6	83
77	78	Male	25	27	14	18	18	0.777778	0.166667	0.0555556	0.166667	0.0230769	0.0769231	0.0384615	0.0384615	0.00769231	0.184615	0	0	0.0153846	0.0153846	0	0.0307692	16	7	5	190
78	78	Female	26	29	14	11	20	1	0	0	0	0.127451	0.0980392	0.0784314	0.00980392	0	0.313725	0	0	0	0	0	0	20	10	6	102
79	69	Female	40	28	14	19	16	0.875	0.125	0	0.125	0.0819672	0.0737705	0.0409836	0.0163934	0	0.213115	0	0	0.00819672	0	0	0.00819672	17	9	6	126
80	62	Female	31	30	15	23	10	0.8	0.2	0	0.4	0.0606061	0.0606061	0.0151515	0.030303	0	0.166667	0	0	0	0.0151515	0	0.0151515	4	5	4	64
81	67	Female	29	30	15	16	9	0.777778	0.222222	0	0	0.108108	0.0540541	0.0810811	0.0135135	0	0.256757	0	0	0	0	0	0	9	6	2	73
82	59	Female	21	30	16	16	12	0.666667	0.25	0.0833333	0	0.047619	0.0595238	0.0357143	0.0595238	0	0.202381	0.0119048	0.0119048	0.0357143	0	0	0.0595238	8	3	1	85
83	61	Female	29	30	16	22	29	0.206897	0.793103	0	0.586207	0.0568182	0.0568182	0.00757576	0.00757576	0.00378788	0.132576	0	0	0.030303	0	0	0.030303	9	8	2	264
84	73	Female	24	25	16	18	15	0.866667	0.0666667	0.0666667	0.0666667	0.0606061	0.0606061	0.0227273	0.0454545	0.00757576	0.19697	0	0	0	0	0	0	14	9	6	129
85	69	Female	31	30	16	22	15	0.866667	0.133333	0	0.133333	0.0535714	0.0535714	0.0267857	0.0714286	0	0.205357	0.00892857	0	0.0267857	0	0	0.0357143	11	9	3	114
86	65	Male	38	29	16	21	8	1	0	0	0	0.0857143	0.128571	0.0142857	0.0428571	0	0.271429	0	0	0	0	0	0	8	8	6	70
87	61	Female	25	30	16	22	13	0.923077	0	0.0769231	0.0769231	0.0941176	0.0470588	0.0352941	0.0117647	0.0117647	0.2	0	0	0.0117647	0.0117647	0	0.0235294	6	7	5	142
88	67	Female	28	27	16	12	19	0.315789	0.578947	0.105263	0.473684	0.0205128	0.0410256	0.0102564	0.0153846	0.0102564	0.0974359	0.00512821	0	0.00512821	0.0102564	0.00512821	0.025641	8	6	3	77
89	69	Female	30	23	16	17	11	0.727273	0.272727	0	0	0.0240964	0.0722892	0.0361446	0.0361446	0.0120482	0.180723	0	0	0	0	0	0	7	4	5	200
90	75	Male	35	29	16	10	17	1	0	0	0	0.0642202	0.0550459	0.0275229	0	0.00917431	0.155963	0	0	0	0	0	0	15	11	6	82
91	73	Female	27	30	16	18	18	0.777778	0.222222	0	0.0555556	0.109589	0.0821918	0.0273973	0.0273973	0.00684931	0.253425	0	0	0.0273973	0.00684931	0	0.0342466	17	9	4	215
92	66	Female	25	29	16	2	21	0.761905	0.142857	0.0952381	0.0952381	0.0740741	0.0634921	0.042328	0.010582	0.005291	0.195767	0.010582	0	0	0.015873	0.015873	0.042328	20	10	6	108
93	62	Female	41	29	16	16	24	0.916667	0.0416667	0.0416667	0	0.0632184	0.0804598	0.0229885	0.0287356	0.00574713	0.201149	0	0.00574713	0	0	0	0.00574713	14	12	6	249
94	69	Female	37	28	16	11	17	0.647059	0.294118	0.0588235	0.235294	0.126984	0.0396825	0.0238095	0.031746	0	0.222222	0.015873	0	0.00793651	0.015873	0	0.0396825	8	5	5	103
95	76	Female	18	28	16	6	12	0.75	0.166667	0.0833333	0.666667	0.0769231	0.0480769	0.0288462	0.0288462	0	0.182692	0.0192308	0	0.00961539	0.0288462	0	0.0576923	10	5	5	45
96	78	Female	28	29	16	26	13	0.0769231	0.692308	0.230769	0	0.00934579	0.0280374	0.00934579	0.00934579	0	0.0560748	0	0	0.0654206	0.0373832	0.00934579	0.11215	6	0	0	129
97	73	Female	26	28	16	14	26	0.692308	0.230769	0.0769231	0.153846	0.0601504	0.0451128	0.0150376	0.037594	0.0075188	0.165414	0.0150376	0	0.0075188	0.0150376	0.0150376	0.0526316	14	9	6	130
98	75	Female	19	27	16	18	12	0.666667	0.333333	0	0.333333	0.0387597	0.0387597	0.0310078	0	0.00775194	0.116279	0	0	0.0387597	0	0	0.0387597	10	3	0	227
99	72	Female	32	28	16	19	23	0.826087	0.130435	0.0434783	0.26087	0.052356	0.0471204	0.0314136	0.0157068	0	0.146597	0.0052356	0	0	0	0.0104712	0.0157068	18	7	6	196
100	63	Male	32	28	16	10	30	0.6	0.4	0	0.466667	0.0617284	0.0411523	0.0205761	0.00411523	0	0.127572	0.00411523	0	0.00823045	0.0164609	0	0.0288066	9	4	2	128
101	76	Female	22	26	16	16	17	0.941176	0.0588235	0	0	0.0392157	0.0980392	0.0392157	0.0490196	0	0.22549	0.00980392	0	0	0.00980392	0	0.0196078	16	9	6	104
102	60	Female	32	30	16	7	12	0.75	0.0833333	0.166667	0.0833333	0.0779221	0.0909091	0.012987	0.0519481	0	0.233766	0	0	0	0.025974	0.025974	0.0519481	9	8	6	79
103	61	Female	34	30	17	20	8	1	0	0	0	0.125	0.0178571	0.0535714	0.0357143	0	0.232143	0.0178571	0	0	0	0	0.0178571	8	8	6	58
104	64	Female	24	30	17	18	12	0.75	0.25	0	0	0.091954	0.0689655	0.0574713	0	0	0.218391	0.0114943	0	0	0	0	0.0114943	12	9	6	104
105	66	Female	25	25	17	15	19	0.526316	0.473684	0	0.105263	0.0277778	0.0486111	0.0347222	0.0277778	0	0.138889	0.00694444	0	0.00694444	0	0	0.0138889	13	7	4	143
106	56	Female	29	30	18	22	16	1	0	0	0.0625	0.112	0.064	0.032	0.048	0	0.256	0	0	0	0	0	0	12	12	6	126
107	73	Female	25	30	18	17	20	0.8	0.1	0.1	0.3	0.046875	0.0546875	0.046875	0.046875	0.0078125	0.203125	0	0	0	0	0	0	9	9	6	158
108	64	Female	21	30	18	19	13	0.923077	0.0769231	0	0	0.0873786	0.0776699	0.038835	0.0291262	0.00970874	0.242718	0	0	0.0194175	0	0	0.0194175	11	8	4	103
109	65	Female	27	27	18	18	12	1	0	0	0	0.0722892	0.0843373	0.0361446	0.0361446	0.0120482	0.240964	0.0120482	0	0.0120482	0	0	0.0240964	12	8	5	102
110	60	Female	28	27	18	10	27	0.518519	0.407407	0.0740741	0.37037	0.0569106	0.0284553	0.0203252	0.0284553	0.00406504	0.138211	0	0.00406504	0	0	0	0.00406504	16	9	6	76
111	64	Female	38	29	18	16	32	0.875	0.09375	0.03125	0.0625	0.0514019	0.046729	0.0046729	0.0186916	0.0046729	0.126168	0	0	0	0.0046729	0.0046729	0.00934579	24	12	6	81
112	64	Female	30	30	18	19	23	0.608696	0.347826	0.0434783	0.26087	0.0449438	0.0280899	0.0224719	0.0337079	0.00561798	0.134831	0.00561798	0	0.00561798	0	0	0.011236	12	10	5	62
113	64	Female	30	30	18	16	20	0.85	0.15	0	0.1	0.111765	0.0882353	0.0294118	0.0294118	0	0.258824	0	0	0	0	0	0	15	12	5	160
114	62	Female	35	29	18	13	18	0.722222	0.277778	0	0.166667	0.0364963	0.0656934	0.0437956	0.0291971	0.00729927	0.182482	0.00729927	0	0	0.00729927	0.00729927	0.0218978	10	7	5	141
115	62	Female	25	24	18	15	19	0.631579	0.368421	0	0.263158	0.0384615	0.0384615	0.021978	0	0.00549451	0.104396	0.00549451	0.00549451	0	0	0.00549451	0.0164835	11	7	5	186
116	72	Female	20	28	19	20	33	0.787879	0.212121	0	0.212121	0.0790698	0.0372093	0.0186047	0.0372093	0	0.172093	0	0	0.00930233	0	0	0.00930233	20	14	6	108
117	65	Female	25	27	20	17	12	0.75	0.166667	0.0833333	0.0833333	0.0375	0.0375	0.025	0.0375	0	0.1375	0.0125	0	0.025	0	0	0.0375	8	7	3	142
